# Supplementary material for: Kinesin Family Member C1 (KIFC1/HSET) Underlies Aggressive Disease in Androgen Receptor-Low and Basal-Like Triple-Negative Breast Cancers
Source: MDPI journal article supplement (doi:10.3390/ijms242216072), 2023-11-08
Supplement: s1 [file s1]

## Supplementary Materials

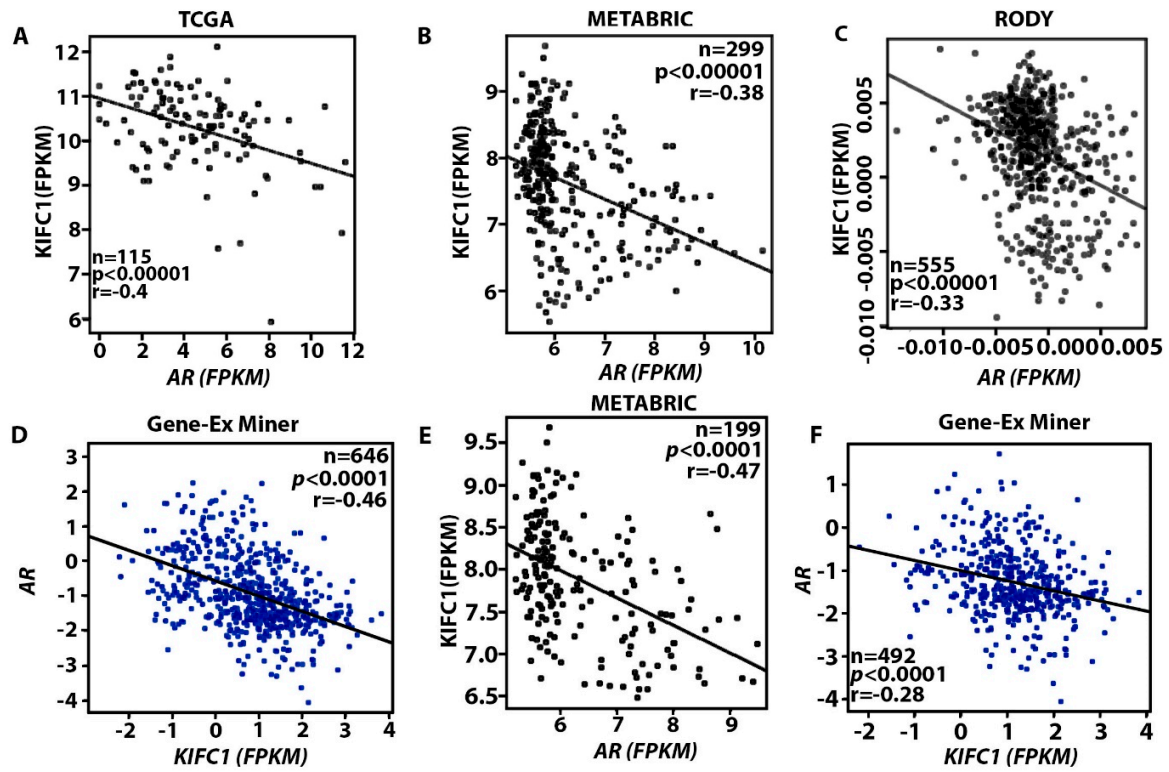

**Figure S1.** Correlation of KIFC1 RNA levels with AR RNA expression in TNBC and basal-like TNBC tumors cross multiple independent databases. Correlation of AR with KIFC1 RNA expression among TNBC tumors in the TCGA (A), METABRIC (B), RODY (C) and gene-x-miner (D) datasets. Correlation of AR with KIFC1 RNA expression among basal-like TNBC tumors in the METABRIC (E) and bc-GenExMiner (F). FPKM, fragments per kilobase exon model per million reads

**Table S1.** Correlation of centrosome-amplification driving genes with AR expression in TNBC tumors in bc-GenExMiner.

| Gene  | Pearson correlation coefficient (r) | p-value | Sample size (n) |
|-------|-------------------------------------|---------|-----------------|
| PLK4  | -0.41                               | <0.0001 | 937             |
| PLK1  | -0.39                               | <0.0001 | 937             |
| CCNA2 | -0.43                               | <0.0001 | 937             |
| STIL  | -0.39                               | <0.0001 | 937             |
| NEK2  | -0.41                               | <0.0001 | 937             |
| E2F1  | -0.12                               | 0.0001  | 937             |
| AURKA | -0.36                               | <0.0001 | 937             |
| E2F2  | -0.26                               | <0.0001 | 937             |
| SASS6 | -0.28                               | <0.0001 | 760             |

|               |              |                   |            |
|---------------|--------------|-------------------|------------|
| <b>CEP152</b> | <b>-0.25</b> | <b>&lt;0.0001</b> | <b>937</b> |
| <b>CDK1</b>   | <b>-0.34</b> | <b>&lt;0.0001</b> | <b>937</b> |
| <b>LMO4</b>   | <b>-0.35</b> | <b>&lt;0.0001</b> | <b>980</b> |
| <b>CCNE2</b>  | <b>-0.22</b> | <b>&lt;0.0001</b> | <b>937</b> |
| <b>MYCN</b>   | <b>-0.09</b> | <b>0.0030</b>     | <b>980</b> |
| <b>TUBG1</b>  | <b>-0.19</b> | <b>&lt;0.0001</b> | <b>937</b> |
| <b>NDRG1</b>  | <b>-0.22</b> | <b>&lt;0.0001</b> | <b>980</b> |
| <b>PIN1</b>   | <b>-0.01</b> | <b>0.6647</b>     | <b>937</b> |

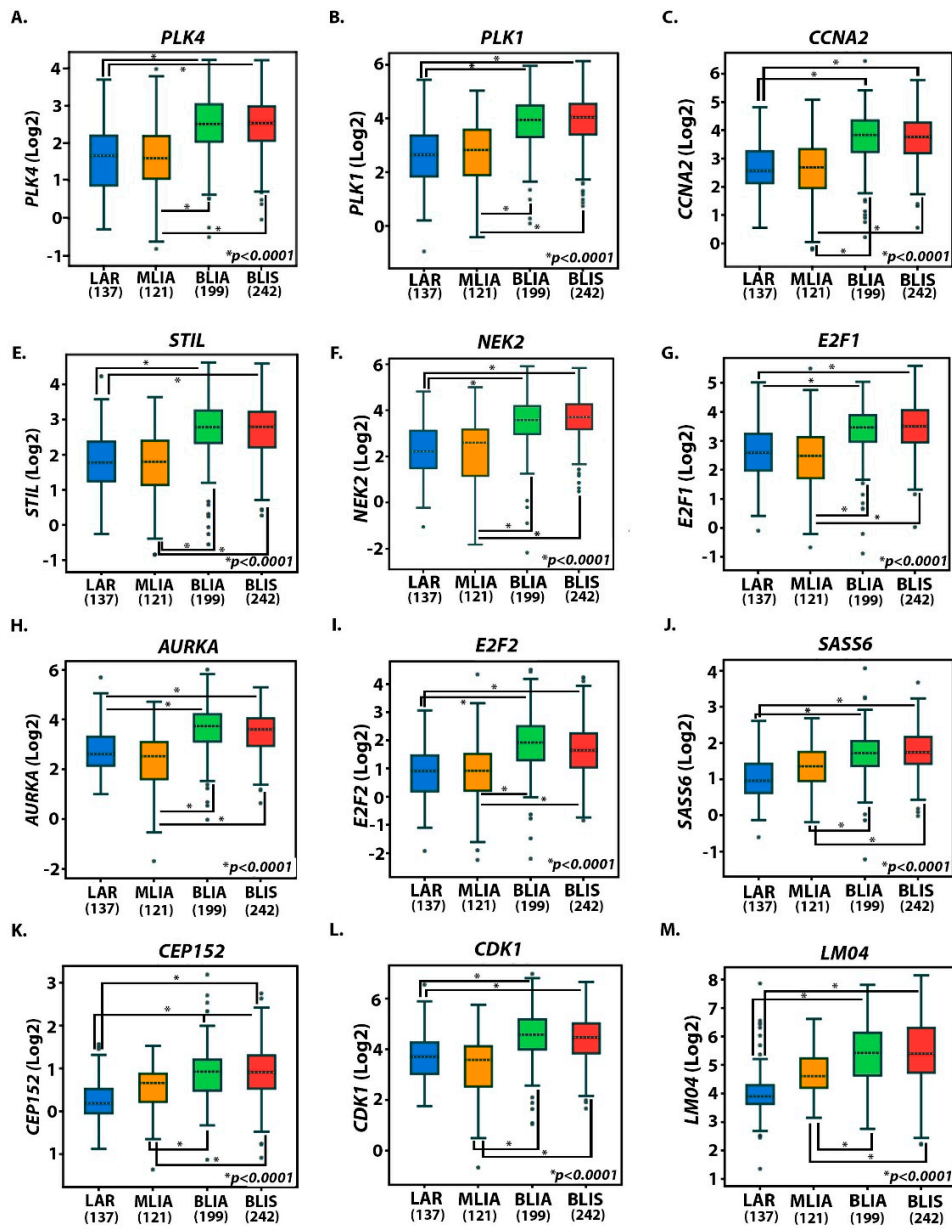

**Figure S2. Differences in expression levels of centrosome-amplification genes among TNBC subtypes.** RNA level differences of centrosome-amplification genes between the four different TNBC subtypes in bc-GenExMiner including LAR, luminal androgen receptor; MLIA, mesenchymal-like immune activated; BLIA, basal-like immune activated; BLIS, basal-like immune suppressed.

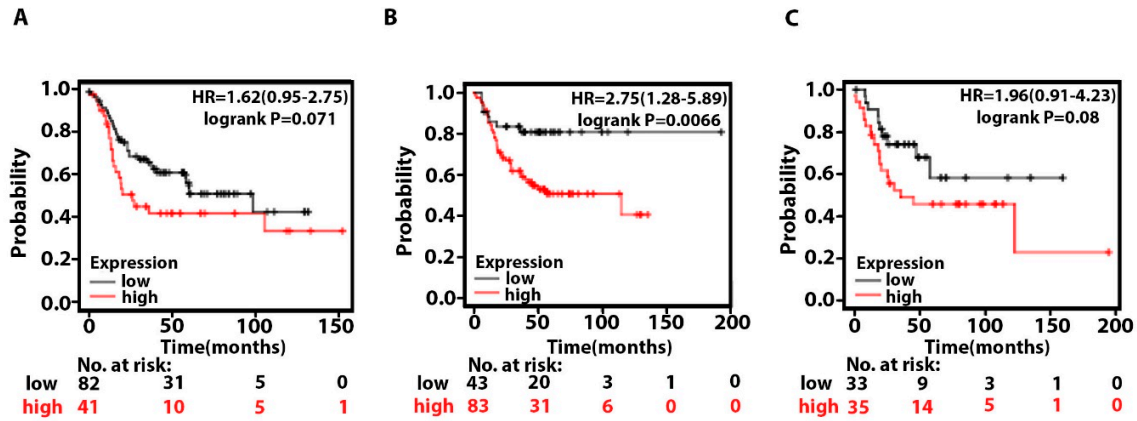

**Figure S3.** Association between expression of centrosome amplification-driving genes and recurrence-free survival in women with TNBC. Kaplan-Meier associations of the mean expression of centrosome amplification-driving genes with recurrence free-survival among LAR (A), BL1 (B), and BL2 (C) TNBC patients in KM Plotter breast cancer database. Optimal cut-offs were referred to for all Kaplan-Meier analyses. CDK1 gene was excluded from analyses due to lack of existing probe.
